# Supplementary material for: Real-World Effectiveness of the mRNA COVID-19 Vaccines in Japan: A Case–Control Study
Source: MDPI journal article supplement (doi:10.3390/vaccines10050779), 2022-05-14
Supplement: s1 [file s1]

**Table S1.** Adjusted odds ratio (aOR) against COVID-19 according to diagnosis period, age group, and vaccine manufacture by place of care or stay.

|                             | Vaccine doses | Diagnosis period |                |                      |               | Age group     |             |               |              | Manufacturer |              |         |              |
|-----------------------------|---------------|------------------|----------------|----------------------|---------------|---------------|-------------|---------------|--------------|--------------|--------------|---------|--------------|
|                             |               | June and July    |                | August and September |               | <60 years old |             | ≥60 years old |              | Pfizer       |              | Moderna |              |
|                             |               | aOR*             | 95% CI         | aOR*                 | 95% CI        | aOR*          | 95% CI      | aOR*          | 95% CI       | aOR*         | 95% CI       | aOR*    | 95% CI       |
| All cases                   | 0             | 1                | (Reference)    | 1                    | (Reference)   | 1             | (Reference) | 1             | (Reference)  | 1            | (Reference)  | 1       | (reference)  |
|                             | 1             | 0.38             | (0.07-2.10)    | 0.32                 | (0.17-0.60)   | 0.34          | (0.19-0.62) | 0.19          | (0.03-1.31)  | 0.38         | (0.21-0.71)  | 0.36    | (0.12-1.10)  |
|                             | 2             | 0.08             | (0.01-0.65)    | 0.21                 | (0.11-0.40)   | 0.24          | (0.12-0.46) | 0.06          | (0.01-0.37)  | 0.19         | (0.10-0.36)  | 0.21    | (0.05-0.87)  |
| Hospitalized cases          | 0             | 1                |                | 1                    |               | 1.00          |             | 1             |              | 1.00         |              | 1       |              |
|                             | 1             | n.c              |                | 0.20                 | (0.06-0.61)   | 0.14          | (0.04-0.46) | n.c           |              | 0.17         | (0.05-0.52)  | 0.22    | (0.04-1.23)  |
|                             | 2             | n.c              |                | 0.02                 | (0.003-0.149) | 0.04          | (0.01-0.25) | n.c           |              | 0.02         | (0.004-0.11) | 0.08    | (0.003-1.98) |
| Stay at hotel or home cases | 0             | 1                | (Reference)    | 1                    | (Reference)   | 1.00          | (Reference) | 1             | (Reference)  | 1.00         | (Reference)  | 1       | (reference)  |
|                             | 1             | 0.12             | (0.006-2.39)   | 0.30                 | (0.16-0.58)   | 0.38          | (0.20-0.71) | 0.09          | (0.01-1.13)  | 0.40         | (0.21-0.77)  | 0.39    | (0.12-1.33)  |
|                             | 2             | 0.005            | (<0.0011-0.21) | 0.26                 | (0.13-0.50)   | 0.29          | (0.14-0.60) | 0.03          | (0.003-0.35) | 0.23         | (0.11-0.45)  | 0.24    | (0.05-1.10)  |

\*Sex, age (10-year intervals), area of residence, underlying medical conditions, PCR test date, handwashing for 20 s, current alcohol drinking, live in a single-family home, and family members commute to work or school. n.c means not calculated.
